# Supplementary material
Source: publisher site journal article supplement (https://www.dovepress.com/article/241721)
Supplement: Supplementary file 1 [file get_supplementary_file.php]

## SUPPLEMENTARY TABLES

**TABLE S1.** DOMAINS OF THE SELF-ADMINISTERED-MPI (SELY-MPI) AND ITS SCORING

| <i>Domain</i> |                    | <i>Scoring by degree of impairment/problem</i>                                   |                       |                 |
|---------------|--------------------|----------------------------------------------------------------------------------|-----------------------|-----------------|
|               |                    | <i>Low = 0</i>                                                                   | <i>Moderate = 0.5</i> | <i>High = 1</i> |
| 1.            | Barthel ADL        | 0-14                                                                             | 15-49                 | 50-60           |
| 2.            | Barthel MOB        | 0-14                                                                             | 15-29                 | 30-40           |
| 3.            | IADL               | 8-6                                                                              | 5-4                   | 3-0             |
| 4.            | TYM                | 50-43                                                                            | 42-24                 | 23-0            |
| 5.            | MNA-SF             | 14-12                                                                            | 11-8                  | 7-0             |
| 6.            | No. of medications | 0-3                                                                              | 4-6                   | ≥7              |
| 7.            | CIRS               | 0                                                                                | 1-2                   | 3-13            |
| 8.            | SFES               | 5-9                                                                              | 10-14                 | 15-25           |
|               |                    | <i>Final Score:</i> Summarize the values assigned to each domain and divide by 8 |                       |                 |

**Abbreviations:** ADL, Activities of Daily Living; MOB, mobility; IADL, instrumental activities of daily living; TYM, Test Your Memory; MNA-SF, Mini Nutritional Assessment Short Form; CIRS, Cumulative Illness Rating Scale; SFES, Gijon's social-familial evaluation scale.

**TABLE S2.** COHABITATION STATUS, EIGHTH DOMAIN OF THE SELFY-MPI SHORT FORM AND ITS SCORING

| <i>Domain</i> |                     | <i>Scoring by degree of impairment/problem</i> |                                |                 |
|---------------|---------------------|------------------------------------------------|--------------------------------|-----------------|
|               |                     | <i>Low = 0</i>                                 | <i>Moderate = 0.5</i>          | <i>High = 1</i> |
| 8.            | Cohabitation status | Living with family members                     | Living in residential facility | Living alone    |

**TABLE S3.** COMPARISON OF THE COMPLETION TIME OF THE SFES SCALE AND THE QUESTION ON THE COHABITATION STATUS (*paired t-test*)

|                     | Mean value (seconds) | Standard deviation | p      |
|---------------------|----------------------|--------------------|--------|
| SFES scale          | 420.16               | ± 106.084          | <0.001 |
| Cohabitation status | 10.23                | ± 2.476            |        |
